# Supplementary material for: Whole-Genome Sequencing and Genomic Variant Analysis of Kazakh Individuals
Source: Front Genet. 2022 Jul 11;13:902804. doi: 10.3389/fgene.2022.902804 (PMC9309552; doi:10.3389/fgene.2022.902804)
Supplement: Supplementary file 1 [file DataSheet1.xlsx]

## Sheet: Table S1 Description
Table S1. Short description of Kazakh individuals
	Age	Gender	Weight	Height	Nationality
KAZ_WG2	41	M	66.3	167	Kazakh
KAZ_WG4	54	M	87	176	Kazakh
KAZ_WG5	60	M	85	176	Kazakh
KAZ_WG6	39	M	75	175	Kazakh
KAZ_WG7	36	F	48	158	Kazakh

## Sheet: Table S2 HetHom TiTv
Table S2. Het/Hom and Ti/Tv metrics.
Autosomes	KAZ_WG2	KAZ_WG4	KAZ_WG5	KAZ_WG6	KAZ_WG7
Total # of SNPs	3302980	3149480	3243823	3280601	3269413
Het	1980142	1811318	1896230	1959676	1940486
Hom	1322838	1338162	1347593	1320925	1328927
N/A	10078	126474	29902	25464	15123
Het/Hom	1.4969	1.3536	1.4071	1.4836	1.4602
Ti	2232646	2125050	2191994	2217030	2209239
Tv	1070334	1024430	1051829	1063571	1060174
Ti/Tv	2.0859	2.0744	2.084	2.0845	2.0838

## Sheet: Figure S1 SNVs distrib
Figure S1. Distribution of novel SNVs according to genome location.

## Sheet: Figure S2 Frequency distr
Figure S2. The frequency distribution of variants based on annotation

## Sheet: Figure S3 InDels distr
Figure S3. Distribution of indel lengths

## Sheet: TableS3 Func ann nsSNP
Table S3. The functional enrichment analysis of 1141 non-reference nonsynonymous somatic SNPs by WebGestalt (p < 0.05)
Description	KEGG Gene Set	Size	Expect	Ratio	P Value	FDR
Olfactory transduction	hsa04740	448	19.734	2.1283	2.0938e-06	0.00068258
Complement and coagulation cascades	hsa04610	79	3.4799	2.8737	0.002308	0.24862
ABC transporters	hsa02010	44	1.9381	3.6117	0.0028325	0.24862
ECM-receptor interaction	hsa04512	82	3.612	2.7686	0.0030505	0.24862
Galactose metabolism	hsa00052	31	1.3655	3.6616	0.010632	0.69323
Fructose and mannose metabolism	hsa00051	33	1.4536	3.4397	0.013826	0.75122
Caffeine metabolism	hsa00232	5	0.22024	9.0809	0.017707	0.79538
Tyrosine metabolism	hsa00350	36	1.5858	3.1531	0.019733	0.79538
Mineral absorption	hsa04978	51	2.2465	2.6708	0.02367	0.79538
Amoebiasis	hsa05146	96	4.2287	2.1283	0.025064	0.79538

## Sheet: Figure S4 Density of nsSNPs
Figure S4. Density of nonsynonymous SNPs by chromosomes.

## Sheet: TableS4 Damaging nsSNP
Table S4. Summary information of nonsynonymous SNPs predicted as damaging by SIFT, Polyphen and Provean
Chromosome	Number of SNPs	Genes
Chr 1	4	CAPN8 (rs35539373), PIGC (rs1063412), HMCN1 (rs10798035), CHIA (rs2275254)
Chr 2	1	NEB (rs10172023)
Chr 3	1	MUC20 (rs3762739)
Chr 4	1	SLC2A9 (rs3733591)
Chr 6	1	DNAH8 (rs1537232)
Chr 7	2	MACC1 (rs3735615), GALNTL5 (rs6960270)
Chr 8	1	GSDMC (rs4144738)
Chr 9	2	OR1J2 (rs41277120), CACNA1B (rs4422842)
Chr 10	2	ZNF239 (rs2230661), LOXL4 (rs1983864)
Chr 11	7	OR56B1 (rs7397032), OR4C3 (rs73464001), OR52N2 (rs8181512), DLAT (rs10891314), EXPH5 (rs2640738), MS4A14 (rs7131283), CD5 (rs2229177)
Chr 12	2	CCDC65 (rs4760600), OR8S1 (rs4075258)
Chr 17	6	GEMIN4 (rs910925), MYH4(rs11651295, rs2277649), MAP2K3 (rs56216806), OR3A1 (rs703903), DRC3 (rs4584886)
Chr 19	2	ZNF208 (rs12975751), ZNF221 (rs439676)
Chr 21	1	UBASH3A (rs2277800)
Chr 22	1	CELSR1 (rs4823850)

## Sheet: Figure S5 Distribution of nsSNP
Figure S5. Distribution of nonsynonymous SNPs found to be damaging across the genome

## Sheet: Table S5 Y-chr and mtDNA haplo
Table S5. Y-chromosome and mtDNA haplogroup identification
Sample ID	mtDNA haplogroup	Defining SNP [Yleaf]	Haplogroup [ISOGG]	Formed ybp [Yfull]
KAZ-WG2	Z3c	Y16221	N1a1a1a1a3a2	2500
KAZ-WG4	J1b2	Z2123	R1a1a1b2a2a	4200
KAZ-WG5	F1b1b	Y14051	R1b1a1a1a1	7200
KAZ-WG6	H7a1	FGC16913	O2a2b1a2a1a3b2a1	6600
KAZ-WG7	T2b34	-	-	-

[truncated: 6 more sheets: Table S6 Y-STR regions profile, Table S7 CommonVariants SNPedia, Table S8 The list of overrepre, Table S9 nsSNPs, Table S10 nsSNP_non-ref_com, TableS11 nsSNPs_non-ref_RD5 ]
